# Supplementary material
Source: HighWire-hosted journal article supplement (https://ez-admanager.com/highwire/filestream/133641/field_highwire_adjunct_files/3/Appendix_e-7.pdf)
Supplement: Appendix_e-7.pdf [file Appendix_e-7.pdf]

## Appendix e-7 Web of Science search strategy

| Combine Sets<br><input type="radio"/> AND <input type="radio"/> OR<br><input type="button" value="COMBINE"/> | Results            | <input type="button" value="SAVE HISTORY"/> <input type="button" value="OPEN SAVED HISTORY"/>                                                                                                                                                                                                                                                                                                                                                                                                                                                       |
|--------------------------------------------------------------------------------------------------------------|--------------------|-----------------------------------------------------------------------------------------------------------------------------------------------------------------------------------------------------------------------------------------------------------------------------------------------------------------------------------------------------------------------------------------------------------------------------------------------------------------------------------------------------------------------------------------------------|
| <input type="checkbox"/> #13                                                                                 | <b>379</b>         | TS=(#11 NOT #12)<br><i>DocType=All document types; Language=English; Database=SCI-EXPANDED; Timespan=1970-2007</i>                                                                                                                                                                                                                                                                                                                                                                                                                                  |
| <input type="checkbox"/> #12                                                                                 | <b>&gt;100,000</b> | TS=((animal OR animals OR rat OR rats OR mouse OR mice))<br><i>DocType=All document types; Language=English; Database=SCI-EXPANDED; Timespan=1970-2007</i>                                                                                                                                                                                                                                                                                                                                                                                          |
| <input type="checkbox"/> #11                                                                                 | <b>436</b>         | TS=(#9 AND #10)<br><i>DocType=All document types; Language=English; Database=SCI-EXPANDED; Timespan=1970-2007</i>                                                                                                                                                                                                                                                                                                                                                                                                                                   |
| <input type="checkbox"/> #10                                                                                 | <b>&gt;100,000</b> | TS=((random?ed* OR cohort* OR "case control*" OR "case series" OR review* OR meta-analys?s OR metaanalys?s OR metanalysis?s))<br><i>DocType=All document types; Language=English; Database=SCI-EXPANDED; Timespan=1970-2007</i>                                                                                                                                                                                                                                                                                                                     |
| <input type="checkbox"/> #9                                                                                  | <b>2,143</b>       | TS=(#1 AND (#2 OR #3 OR #4 OR #5 OR #6 OR #7 OR #8))<br><i>DocType=All document types; Language=English; Database=SCI-EXPANDED; Timespan=1970-2007</i>                                                                                                                                                                                                                                                                                                                                                                                              |
| <input type="checkbox"/> #8                                                                                  | <b>18,332</b>      | TS=((levetiracetam OR piracetam OR "botulinum toxin" OR "botulinum toxins" OR "botullnum toxin A" OR "botulinum toxin B" OR "botulinum toxin type A" OR "botulinum toxin type B" OR pallidotomy OR thalamotomy OR "deep brain stimulation" OR biofeedback OR "electroconvulsive therapy"))<br><i>DocType=All document types; Language=English; Database=SCI-EXPANDED; Timespan=1970-2007</i>                                                                                                                                                        |
| <input type="checkbox"/> #7                                                                                  | <b>&gt;100,000</b> | TS=((verapamil OR diltiazem OR buspirone OR nefazadone OR ondansetron OR naloxone OR morphine OR cerulein OR ceruletide OR corticosteroid OR corticosteroids OR lithium OR estrogen OR oestrogen))<br><i>DocType=All document types; Language=English; Database=SCI-EXPANDED; Timespan=1970-2007</i>                                                                                                                                                                                                                                                |
| <input type="checkbox"/> #6                                                                                  | <b>&gt;100,000</b> | TS=((diazepam OR valproate OR "valproic acid" OR baclo*en OR benzodiazepine OR benzodiazepines OR biperiden OR "vitamin E" OR alpha-tocopherol OR alphantocopherol OR "eicosapentaenoic acid" OR selegiline OR melatonin OR "branched chain amino acid" OR "branched chain amino acids" OR amantadine OR "calcium channel antagonist" OR "calcium channel antagonists" OR "calcium channel blocker" OR "calcium channel blockers" OR nifedipine))<br><i>DocType=All document types; Language=English; Database=SCI-EXPANDED; Timespan=1970-2007</i> |
| <input type="checkbox"/> #5                                                                                  | <b>38,127</b>      | TS=((piribedil OR pramipexole OR ropinirole OR levodopa OR propranolol OR anticholinergic OR anticholinergics OR donepezil OR rivastigmine OR galantamine OR tacrine OR memantine OR deanol OR meclofenozate OR "GABA agonist" OR "GABA agonists" OR clonazepam))<br><i>DocType=All document types; Language=English; Database=SCI-EXPANDED; Timespan=1970-2007</i>                                                                                                                                                                                 |

Appendix e-7 Web of Science search strategy

|                                                                                                                                          |               |                                                                                                                                                                                                                                                                                                                                                                                                                                                                                                                                                                    |
|------------------------------------------------------------------------------------------------------------------------------------------|---------------|--------------------------------------------------------------------------------------------------------------------------------------------------------------------------------------------------------------------------------------------------------------------------------------------------------------------------------------------------------------------------------------------------------------------------------------------------------------------------------------------------------------------------------------------------------------------|
| <input type="checkbox"/> #4                                                                                                              | <b>11,913</b> | TS=((aripiprazole OR ziprasidone OR zuclopenthixol OR tetrabenazine OR reserpine OR alpha-methyl-para-tyrosine OR alphamethylparatyrosine OR alpha-methyl-dopa OR alphamethyl-dopa OR bromocriptine OR pergolide))<br><i>DocType=All document types; Language=English; Database=SCI-EXPANDED; Timespan=1970-2007</i>                                                                                                                                                                                                                                               |
| <input type="checkbox"/> #3                                                                                                              | <b>32,169</b> | TS=((haloperidol OR chlorpromazine OR fluperlapine OR sulpiride OR thiopropazate OR molindone OR tiapride OR clozapine OR risperidone OR olanzapine OR quetiapine OR sertindole))<br><i>DocType=All document types; Language=English; Database=SCI-EXPANDED; Timespan=1970-2007</i>                                                                                                                                                                                                                                                                                |
| <input type="checkbox"/> #2                                                                                                              | <b>12,092</b> | TS=(("neuroleptic discontinuation" OR "neuroleptic cessation" OR reversibility OR "switching antipsychotic*" OR "switching neuroleptic*" OR "typical antipsychotic*"))<br><i>DocType=All document types; Language=English; Database=SCI-EXPANDED; Timespan=1970-2007</i>                                                                                                                                                                                                                                                                                           |
| <input type="checkbox"/> #1                                                                                                              | <b>4,299</b>  | TS=(("tardive syndrome*" OR "tardive dyskinesia*" OR "tardive tremo*" OR "tardive dystonia*" OR "tardive tourettism" OR "tardive stereotypy" OR "tardive myoclonus" OR "classical tardive dyskinesia*" OR "neuroleptic induced movement disorder*" OR "neuroleptic-induced movement disorder*" OR "medication induced movement disorder*" OR "medication-induced movement disorder*" OR "drug-induced movement disorder*" OR "drug induced movement disorder*"))<br><i>DocType=All document types; Language=English; Database=SCI-EXPANDED; Timespan=1970-2007</i> |
| <input type="radio"/> AND <input type="radio"/> OR<br> |               |                                                                                                                                                                                                                                                                                                                                                                                                                                                                                                                                                                    |
